# Supplementary material
Source: PubMed Central journal article supplement (PMC3793622)
Supplement: supp_P037614_jlr.P037614-1.pdf [file supp_P037614_jlr.P037614-1.pdf]

**Relationship between Serum Cholesterol and Indices of Erythrocytes and Platelets in the U.S.  
Population**

Michael B. Fessler, MD; Kathryn Rose, PhD; Yanmei Zhang; Renee Jaramillo, MStat; Darryl C. Zeldin, MD

**Supplementary Data**

**Supplementary Table 1. Sensitivity analysis<sup>1</sup> of mean hematocrit by quartile<sup>2</sup> of serum cholesterol measures in adult subjects in NHANES 2005-2006**

|                          | 2005-2006                      |
|--------------------------|--------------------------------|
|                          | Hematocrit (%)<br>Mean (95%CI) |
| <b>Total</b>             | N = 3094                       |
| <b>HDL-C (mg/dL)</b>     |                                |
| Unadjusted <sup>3</sup>  |                                |
| Low                      | 44.82 (44.42, 45.21)           |
| Medium                   | 43.25 (42.69, 43.81)           |
| High                     | 42.37 (41.74, 42.99)           |
| Very high                | 41.75 (41.18, 42.32)           |
| Trend p value            | <0.001                         |
| Adjusted <sup>4</sup>    |                                |
| Low                      | 43.28 (42.88, 43.67)           |
| Medium                   | 42.88 (42.28, 43.49)           |
| High                     | 43.13 (42.47, 43.79)           |
| Very high                | 42.86 (42.35, 43.37)           |
| Trend p value            | 0.099                          |
| <b>Non-HDL-C (mg/dL)</b> |                                |
| Unadjusted <sup>3</sup>  |                                |
| Low                      | 42.20 (41.57, 42.82)           |
| Medium                   | 42.56 (41.89, 43.23)           |
| High                     | 43.14 (42.62, 43.66)           |
| Very high                | 44.02 (43.53, 44.51)           |
| Trend p value            | <0.001                         |
| Adjusted <sup>4</sup>    |                                |
| Low                      | 42.43 (41.84, 43.02)           |
| Medium                   | 42.70 (42.12, 43.27)           |
| High                     | 43.14 (42.63, 43.64)           |
| Very high                | 43.74 (43.17, 44.30)           |
| Trend p value            | <0.001                         |

<sup>1</sup> Removed participants with: history of liver disease, history of cancer, statin use within past 30 days, current pregnancy, or treatment for anemia within the past 3 months.

<sup>2</sup> Cholesterol quartiles were determined from NHANES 2005-2006 and are as follows: HDL-C (low [ $\leq$ 41.83 mg/dL]; medium [ $>$ 41.83–51.38 mg/dL]; high [ $>$ 51.38–62.93 mg/dL]; and very high [ $>$ 62.93 mg/dL]), and non-HDL-C (low [ $\leq$ 114.42 mg/dL]; medium [ $>$ 114.42–140.1 mg/dL]; high [ $>$ 140.1–168.28 mg/dL]; and very high [ $>$ 168.28 mg/dL]).

<sup>3</sup> Unadjusted model.

<sup>4</sup> Adjusted for age, race/ethnicity, gender, smoking and BMI.

**Supplementary Table 2. Sensitivity analysis<sup>1</sup> of geometric mean hemoglobin by quartile<sup>2</sup> of serum cholesterol measures in adult subjects in NHANES 2005-2006**

|                          | 2005-2006                         |
|--------------------------|-----------------------------------|
|                          | Hemoglobin (g/dL)<br>Mean (95%CI) |
| <b>Total</b>             | N = 3094                          |
| <b>HDL-C (mg/dL)</b>     |                                   |
| Unadjusted <sup>3</sup>  |                                   |
| Low                      | 15.18 (15.09, 15.27)              |
| Medium                   | 14.58 (14.41, 14.76)              |
| High                     | 14.27 (14.08, 14.46)              |
| Very high                | 14.08 (13.90, 14.26)              |
| Trend p value            | <0.001                            |
| Adjusted <sup>4</sup>    |                                   |
| Low                      | 14.62 (14.52, 14.72)              |
| Medium                   | 14.46 (14.27, 14.65)              |
| High                     | 14.54 (14.34, 14.74)              |
| Very high                | 14.45 (14.32, 14.59)              |
| Trend p value            | 0.081                             |
| <b>Non-HDL-C (mg/dL)</b> |                                   |
| Unadjusted <sup>3</sup>  |                                   |
| Low                      | 14.18 (13.95, 14.42)              |
| Medium                   | 14.35 (14.17, 14.53)              |
| High                     | 14.57 (14.44, 14.70)              |
| Very high                | 14.88 (14.72, 15.05)              |
| Trend p value            | <0.001                            |
| Adjusted <sup>4</sup>    |                                   |
| Low                      | 14.27 (14.09, 14.46)              |
| Medium                   | 14.40 (14.27, 14.53)              |
| High                     | 14.57 (14.45, 14.69)              |
| Very high                | 14.78 (14.59, 14.96)              |
| Trend p value            | <0.001                            |

<sup>1</sup> Removed participants with: history of liver disease, history of cancer, statin use within past 30 days, current pregnancy, or treatment for anemia within the past 3 months.

<sup>2</sup> Cholesterol quartiles were determined from NHANES 2005-2006 and are as follows: HDL-C (low [ $\leq 41.83$  mg/dL]; medium [ $>41.83$ – $51.38$  mg/dL]; high [ $>51.38$ – $62.93$  mg/dL]; and very high [ $>62.93$  mg/dL]), and non-HDL-C (low [ $\leq 114.42$  mg/dL]; medium [ $>114.42$ – $140.1$  mg/dL]; high [ $>140.1$ – $168.28$  mg/dL]; and very high [ $>168.28$  mg/dL]).

<sup>3</sup> Unadjusted model.

<sup>4</sup> Adjusted for age, race/ethnicity, gender, smoking and BMI.

**Supplementary Table 3. Sensitivity analysis<sup>1</sup> of mean erythrocyte count by quartile<sup>2</sup> of serum cholesterol measures in adult subjects in NHANES 2005-2006**

|                          | 2005-2006                       |
|--------------------------|---------------------------------|
|                          | RBC (million/uL)<br>Mean(95%CI) |
| <b>Total</b>             | N = 3094                        |
| <b>HDL-C (mg/dL)</b>     |                                 |
| Unadjusted <sup>3</sup>  |                                 |
| Low                      | 5.04 (5.00, 5.09)               |
| Medium                   | 4.84 (4.78, 4.90)               |
| High                     | 4.71 (4.64, 4.77)               |
| Very high                | 4.56 (4.51, 4.62)               |
| Trend p value            | <0.001                          |
| Adjusted <sup>4</sup>    |                                 |
| Low                      | 4.88 (4.84, 4.92)               |
| Medium                   | 4.80 (4.73, 4.86)               |
| High                     | 4.78 (4.71, 4.85)               |
| Very high                | 4.69 (4.64, 4.75)               |
| Trend p value            | <0.001                          |
| <b>Non-HDL-C (mg/dL)</b> |                                 |
| Unadjusted <sup>3</sup>  |                                 |
| Low                      | 4.70 (4.64, 4.75)               |
| Medium                   | 4.72 (4.63, 4.81)               |
| High                     | 4.82 (4.76, 4.87)               |
| Very high                | 4.89 (4.85, 4.93)               |
| Trend p value            | <0.001                          |
| Adjusted <sup>4</sup>    |                                 |
| Low                      | 4.71 (4.64, 4.77)               |
| Medium                   | 4.73 (4.66, 4.81)               |
| High                     | 4.82 (4.78, 4.86)               |
| Very high                | 4.87 (4.81, 4.92)               |
| Trend p value            | <0.001                          |

<sup>1</sup> Removed participants with: history of liver disease, history of cancer, statin use within past 30 days, current pregnancy, or treatment for anemia within the past 3 months.

<sup>2</sup> Cholesterol quartiles were determined from NHANES 2005-2006 and are as follows: HDL-C (low [ $\leq 41.83$  mg/dL]; medium [ $>41.83$ – $51.38$  mg/dL]; high [ $>51.38$ – $62.93$  mg/dL]; and very high [ $>62.93$  mg/dL]), and non-HDL-C (low [ $\leq 114.42$  mg/dL]; medium [ $>114.42$ – $140.1$  mg/dL]; high [ $>140.1$ – $168.28$  mg/dL]; and very high [ $>168.28$  mg/dL]).

<sup>3</sup> Unadjusted model.

<sup>4</sup> Adjusted for age, race/ethnicity, gender, smoking and BMI.

**Supplementary Table 4. Sensitivity analysis<sup>1</sup> of erythrocyte mean corpuscular volume by quartile<sup>2</sup> of serum cholesterol measures in adult subjects in NHANES 2005-2006**

|                          | 2005-2006                             |
|--------------------------|---------------------------------------|
|                          | Mean cell volume (fL)<br>Mean (95%CI) |
| <b>Total</b>             | N = 3094                              |
| <b>HDL-C (mg/dL)</b>     |                                       |
| Unadjusted <sup>3</sup>  |                                       |
| Low                      | 88.96 (88.59, 89.33)                  |
| Medium                   | 89.47 (88.85, 90.09)                  |
| High                     | 90.13 (89.60, 90.66)                  |
| Very high                | 91.67 (91.20, 92.14)                  |
| Trend p value            | <0.001                                |
| Adjusted <sup>4</sup>    |                                       |
| Low                      | 88.83 (88.38, 89.28)                  |
| Medium                   | 89.54 (88.94, 90.15)                  |
| High                     | 90.42 (89.97, 90.88)                  |
| Very high                | 91.51 (91.14, 91.88)                  |
| Trend p value            | <0.001                                |
| <b>Non-HDL-C (mg/dL)</b> |                                       |
| Unadjusted <sup>3</sup>  |                                       |
| Low                      | 90.07 (89.31, 90.84)                  |
| Medium                   | 90.32 (89.66, 90.98)                  |
| High                     | 89.70 (89.17, 90.23)                  |
| Very high                | 90.21 (89.66, 90.75)                  |
| Trend p value            | 0.890                                 |
| Adjusted <sup>4</sup>    |                                       |
| Low                      | 90.34 (89.79, 90.89)                  |
| Medium                   | 90.41 (89.90, 90.91)                  |
| High                     | 89.65 (89.02, 90.27)                  |
| Very high                | 90.03 (89.45, 90.61)                  |
| Trend p value            | 0.151                                 |

<sup>1</sup> Removed participants with: history of liver disease, history of cancer, statin use within past 30 days, current pregnancy, or treatment for anemia within the past 3 months.

<sup>2</sup> Cholesterol quartiles were determined from NHANES 2005-2006 and are as follows: HDL-C (low [ $\leq 41.83$  mg/dL]; medium [ $>41.83$ – $51.38$  mg/dL]; high [ $>51.38$ – $62.93$  mg/dL]; and very high [ $>62.93$  mg/dL]), and non-HDL-C (low [ $\leq 114.42$  mg/dL]; medium [ $>114.42$ – $140.1$  mg/dL]; high [ $>140.1$ – $168.28$  mg/dL]; and very high [ $>168.28$  mg/dL]).

<sup>3</sup> Unadjusted model.

<sup>4</sup> Adjusted for age, race/ethnicity, gender, smoking and BMI.

**Supplementary Table 5. Sensitivity analysis<sup>1</sup> of mean platelet crit by quartile<sup>2</sup> of serum cholesterol measures in adult subjects in NHANES 2005-2006**

|                          | 2005-2006                        |
|--------------------------|----------------------------------|
|                          | Platelet crit (%)<br>Mean(95%CI) |
| <b>Total</b>             | N = 3094                         |
| <b>HDL-C (mg/dL)</b>     |                                  |
| Unadjusted <sup>3</sup>  |                                  |
| Low                      | 0.225 (0.222, 0.228)             |
| Medium                   | 0.230 (0.225, 0.235)             |
| High                     | 0.231 (0.226, 0.236)             |
| Very high                | 0.226 (0.221, 0.230)             |
| Trend p value            | 0.728                            |
| Adjusted <sup>4</sup>    |                                  |
| Low                      | 0.229 (0.225, 0.232)             |
| Medium                   | 0.231 (0.226, 0.236)             |
| High                     | 0.227 (0.223, 0.232)             |
| Very high                | 0.224 (0.220, 0.228)             |
| Trend p value            | 0.060                            |
| <b>Non-HDL-C (mg/dL)</b> |                                  |
| Unadjusted <sup>3</sup>  |                                  |
| Low                      | 0.219 (0.214, 0.225)             |
| Medium                   | 0.226 (0.221, 0.231)             |
| High                     | 0.232 (0.227, 0.238)             |
| Very high                | 0.232 (0.228, 0.237)             |
| Trend p value            | 0.001                            |
| Adjusted <sup>4</sup>    |                                  |
| Low                      | 0.216 (0.211, 0.222)             |
| Medium                   | 0.225 (0.220, 0.229)             |
| High                     | 0.234 (0.228, 0.239)             |
| Very high                | 0.235 (0.231, 0.239)             |
| Trend p value            | <0.001                           |

<sup>1</sup> Removed participants with: history of liver disease, history of cancer, statin use within past 30 days, current pregnancy, or treatment for anemia within the past 3 months.

<sup>2</sup> Cholesterol quartiles were determined from NHANES 2005-2006 and are as follows: HDL-C (low [ $\leq 41.83$  mg/dL]; medium [ $>41.83$ – $51.38$  mg/dL]; high [ $>51.38$ – $62.93$  mg/dL]; and very high [ $>62.93$  mg/dL]), and non-HDL-C (low [ $\leq 114.42$  mg/dL]; medium [ $>114.42$ – $140.1$  mg/dL]; high [ $>140.1$ – $168.28$  mg/dL]; and very high [ $>168.28$  mg/dL]).

<sup>3</sup> Unadjusted model.

<sup>4</sup> Adjusted for age, race/ethnicity, gender, smoking and BMI.

**Supplementary Table 6. Sensitivity analysis<sup>1</sup> of geometric mean platelet count by quartile<sup>2</sup> of serum cholesterol measures in adult subjects in NHANES 2005-2006**

|                          | 2005-2006                               |
|--------------------------|-----------------------------------------|
|                          | Platelet (1000 cells/uL)<br>Mean(95%CI) |
| <b>Total</b>             | N = 3094                                |
| <b>HDL-C (mg/dL)</b>     |                                         |
| Unadjusted <sup>3</sup>  |                                         |
| Low                      | 270.07 (265.21, 275.01)                 |
| Medium                   | 278.19 (272.58, 283.92)                 |
| High                     | 276.97 (269.17, 284.99)                 |
| Very high                | 276.84 (272.11, 281.66)                 |
| Trend p value            | 0.046                                   |
| Adjusted <sup>4</sup>    |                                         |
| Low                      | 273.95 (268.50, 279.51)                 |
| Medium                   | 279.14 (273.80, 284.59)                 |
| High                     | 273.36 (266.63, 280.26)                 |
| Very high                | 275.38 (270.78, 280.05)                 |
| Trend p value            | 0.864                                   |
| <b>Non-HDL-C (mg/dL)</b> |                                         |
| Unadjusted <sup>3</sup>  |                                         |
| Low                      | 264.00 (256.56, 271.65)                 |
| Medium                   | 274.11 (266.67, 281.76)                 |
| High                     | 282.46 (277.02, 288.01)                 |
| Very high                | 280.48 (274.34, 286.76)                 |
| Trend p value            | 0.001                                   |
| Adjusted <sup>4</sup>    |                                         |
| Low                      | 259.64 (252.78, 266.69)                 |
| Medium                   | 272.59 (265.90, 279.46)                 |
| High                     | 284.19 (278.38, 290.12)                 |
| Very high                | 284.07 (278.85, 289.39)                 |
| Trend p value            | <0.001                                  |

<sup>1</sup> Removed participants with: history of liver disease, history of cancer, statin use within past 30 days, current pregnancy, or treatment for anemia within the past 3 months.

<sup>2</sup> Cholesterol quartiles were determined from NHANES 2005-2006 and are as follows: HDL-C (low [ $\leq$ 41.83 mg/dL]; medium [ $>$ 41.83–51.38 mg/dL]; high [ $>$ 51.38–62.93 mg/dL]; and very high [ $>$ 62.93 mg/dL]), and non-HDL-C (low [ $\leq$ 114.42 mg/dL]; medium [ $>$ 114.42–140.1 mg/dL]; high [ $>$ 140.1–168.28 mg/dL]; and very high [ $>$ 168.28 mg/dL]).

<sup>3</sup> Unadjusted model.

<sup>4</sup> Adjusted for age, race/ethnicity, gender, smoking and BMI.

**Supplementary Table 7. Gender composition of NHANES 2005-2006 and 2007-2008 study populations by serum cholesterol quartile <sup>1</sup>**

|                          | 2005-2006  | 2007-2008  |
|--------------------------|------------|------------|
|                          | % Male     | % Male     |
| <b>HDL-C (mg/dL)</b>     |            |            |
| Low                      | 75.5 (1.3) | 68.5 (1.6) |
| Medium                   | 56.9 (1.8) | 55.2 (1.3) |
| High                     | 36.0 (1.9) | 40.4 (2.1) |
| Very high                | 27.1 (1.3) | 22.6 (1.1) |
| Trend p value            | <0.001     | <0.001     |
| <b>Non-HDL-C (mg/dL)</b> |            |            |
| Low                      | 43.5 (2.0) | 44.6 (1.7) |
| Medium                   | 46.8 (1.7) | 46.4 (1.6) |
| High                     | 48.1 (1.7) | 48.6 (2.2) |
| Very high                | 53.8 (1.4) | 53.0 (2.0) |
| Trend p value            | 0.001      | 0.025      |

<sup>1</sup> Cholesterol quartiles were determined from NHANES 2005-2006 and are as follows: HDL-C (low [ $\leq 41.83$  mg/dL]; medium [ $>41.83$ – $51.38$  mg/dL]; high [ $>51.38$ – $62.93$  mg/dL]; and very high [ $>62.93$  mg/dL]), and non-HDL-C (low [ $\leq 114.42$  mg/dL]; medium [ $>114.42$ – $140.1$  mg/dL]; high [ $>140.1$ – $168.28$  mg/dL]; and very high [ $>168.28$  mg/dL]).



**Supplementary Table 8. Mean Hematocrit Level by Quartile of Cholesterol Measures in Females<sup>1</sup>**

| NHANES Survey            | 2005-2006                      | 2007-2008                      |
|--------------------------|--------------------------------|--------------------------------|
|                          | Hematocrit (%)<br>Mean (95%CI) | Hematocrit (%)<br>Mean (95%CI) |
|                          | N = 2321                       | N = 2710                       |
| <b>HDL-C (mg/dL)</b>     |                                |                                |
| Unadjusted <sup>2</sup>  |                                |                                |
| Low                      | 40.45 (39.89, 41.00)           | 39.40 (38.89, 39.90)           |
| Medium                   | 39.98 (39.32, 40.64)           | 39.54 (39.06, 40.02)           |
| High                     | 40.54 (39.94, 41.15)           | 39.24 (38.67, 39.80)           |
| Very high                | 40.10 (39.51, 40.68)           | 38.97 (38.34, 39.60)           |
| Trend p value            | 0.686                          | 0.041                          |
| Adjusted <sup>3</sup>    |                                |                                |
| Low                      | 40.20 (39.63, 40.77)           | 39.01 (38.48, 39.53)           |
| Medium                   | 39.94 (39.22, 40.65)           | 39.48 (38.92, 40.05)           |
| High                     | 40.62 (40.00, 41.23)           | 39.23 (38.68, 39.78)           |
| Very high                | 40.18 (39.62, 40.75)           | 39.24 (38.71, 39.77)           |
| Trend p value            | 0.587                          | 0.744                          |
| <b>Non-HDL-C (mg/dL)</b> |                                |                                |
| Unadjusted <sup>2</sup>  |                                |                                |
| Low                      | 39.72 (39.01, 40.43)           | 38.42 (38.03, 38.81)           |
| Medium                   | 39.92 (39.45, 40.38)           | 39.18 (38.59, 39.77)           |
| High                     | 40.50 (39.89, 41.11)           | 39.32 (38.73, 39.91)           |
| Very high                | 40.96 (40.27, 41.66)           | 40.13 (39.45, 40.81)           |
| Trend p value            | <0.001                         | <0.001                         |
| Adjusted <sup>3</sup>    |                                |                                |
| Low                      | 39.95 (39.25, 40.64)           | 38.70 (38.32, 39.08)           |
| Medium                   | 39.98 (39.46, 40.49)           | 39.24 (38.67, 39.80)           |
| High                     | 40.40 (39.76, 41.03)           | 39.24 (38.67, 39.81)           |
| Very high                | 40.81 (40.14, 41.48)           | 39.90 (39.22, 40.59)           |
| Trend p value            | <0.001                         | <0.001                         |

<sup>1</sup> Cholesterol quartiles are as follows: HDL-C (low [ $\leq$ 41.83 mg/dL]; medium [ $>$ 41.83–51.38 mg/dL]; high [ $>$ 51.38–62.93 mg/dL]; and very high [ $>$ 62.93 mg/dL]), and non-HDL-C (low [ $\leq$ 114.42 mg/dL]; medium [ $>$ 114.42–140.1 mg/dL]; high [ $>$ 140.1–168.28 mg/dL]; and very high [ $>$ 168.28 mg/dL]).

<sup>2</sup> Unadjusted model.

<sup>3</sup> Adjusted for age, race/ethnicity, gender, smoking and BMI.

**Supplementary Table 9. Mean Hematocrit Level by Quartile of Cholesterol Measures in Males<sup>1</sup>**

| NHANES Survey            | 2005-2006                      | 2007-2008                      |
|--------------------------|--------------------------------|--------------------------------|
|                          | Hematocrit (%)<br>Mean (95%CI) | Hematocrit (%)<br>Mean (95%CI) |
|                          | N = 2148                       | N = 2608                       |
| <b>HDL-C (mg/dL)</b>     |                                |                                |
| Unadjusted <sup>2</sup>  |                                |                                |
| Low                      | 45.64 (45.19, 46.09)           | 44.33 (43.93, 44.74)           |
| Medium                   | 45.30 (44.73, 45.86)           | 44.11 (43.52, 44.70)           |
| High                     | 44.99 (44.39, 45.59)           | 44.19 (43.48, 44.91)           |
| Very high                | 44.86 (44.31, 45.41)           | 43.93 (43.17, 44.68)           |
| Trend p value            | 0.005                          | 0.226                          |
| Adjusted <sup>3</sup>    |                                |                                |
| Low                      | 45.47 (45.06, 45.87)           | 44.18 (43.71, 44.66)           |
| Medium                   | 45.36 (44.81, 45.91)           | 44.20 (43.60, 44.80)           |
| High                     | 45.15 (44.62, 45.69)           | 44.26 (43.55, 44.96)           |
| Very high                | 45.05 (44.57, 45.54)           | 44.14 (43.44, 44.84)           |
| Trend p value            | 0.067                          | 0.944                          |
| <b>Non-HDL-C (mg/dL)</b> |                                |                                |
| Unadjusted <sup>2</sup>  |                                |                                |
| Low                      | 44.55 (44.06, 45.04)           | 43.21 (42.63, 43.78)           |
| Medium                   | 45.05 (44.29, 45.81)           | 43.92 (43.13, 44.71)           |
| High                     | 45.44 (44.94, 45.94)           | 44.58 (43.97, 45.18)           |
| Very high                | 45.97 (45.53, 46.42)           | 44.86 (44.56, 45.17)           |
| Trend p value            | <0.001                         | <0.001                         |
| Adjusted <sup>3</sup>    |                                |                                |
| Low                      | 44.58 (44.06, 45.10)           | 43.26 (42.76, 43.77)           |
| Medium                   | 45.13 (44.50, 45.77)           | 43.98 (43.16, 44.80)           |
| High                     | 45.49 (45.07, 45.91)           | 44.54 (43.89, 45.18)           |
| Very high                | 45.90 (45.45, 46.35)           | 44.81 (44.47, 45.16)           |
| Trend p value            | <0.001                         | <0.001                         |

<sup>1</sup> Cholesterol quartiles are as follows: HDL-C (low [ $\leq 41.83$  mg/dL]; medium [ $>41.83$ – $51.38$  mg/dL]; high [ $>51.38$ – $62.93$  mg/dL]; and very high [ $>62.93$  mg/dL]), and non-HDL-C (low [ $\leq 114.42$  mg/dL]; medium [ $>114.42$ – $140.1$  mg/dL]; high [ $>140.1$ – $168.28$  mg/dL]; and very high [ $>168.28$  mg/dL]).

<sup>2</sup> Unadjusted model.

<sup>3</sup> Adjusted for age, race/ethnicity, gender, smoking and BMI.

**Supplementary Table 10. Geometric Mean of Hemoglobin Concentration by Quartile of Cholesterol Measures in Females<sup>1</sup>**

| NHANES Survey            | 2005-2006                         | 2007-2008                         |
|--------------------------|-----------------------------------|-----------------------------------|
|                          | Hemoglobin (g/dL)<br>Mean (95%CI) | Hemoglobin (g/dL)<br>Mean (95%CI) |
|                          | N = 2321                          | N = 2710                          |
| <b>HDL-C (mg/dL)</b>     |                                   |                                   |
| Unadjusted <sup>2</sup>  |                                   |                                   |
| Low                      | 13.62 (13.44, 13.80)              | 13.50 (13.28, 13.72)              |
| Medium                   | 13.46 (13.23, 13.70)              | 13.51 (13.31, 13.71)              |
| High                     | 13.64 (13.45, 13.82)              | 13.41 (13.17, 13.65)              |
| Very high                | 13.51 (13.34, 13.69)              | 13.32 (13.07, 13.57)              |
| Trend p value            | 0.783                             | 0.023                             |
| Adjusted <sup>3</sup>    |                                   |                                   |
| Low                      | 13.53 (13.37, 13.70)              | 13.37 (13.15, 13.58)              |
| Medium                   | 13.45 (13.21, 13.68)              | 13.51 (13.28, 13.74)              |
| High                     | 13.67 (13.49, 13.85)              | 13.41 (13.19, 13.63)              |
| Very high                | 13.54 (13.38, 13.69)              | 13.40 (13.20, 13.61)              |
| Trend p value            | 0.562                             | 0.839                             |
| <b>Non-HDL-C (mg/dL)</b> |                                   |                                   |
| Unadjusted <sup>2</sup>  |                                   |                                   |
| Low                      | 13.31 (13.07, 13.56)              | 13.14 (12.96, 13.32)              |
| Medium                   | 13.47 (13.32, 13.61)              | 13.38 (13.15, 13.61)              |
| High                     | 13.66 (13.48, 13.83)              | 13.42 (13.16, 13.69)              |
| Very high                | 13.81 (13.59, 14.04)              | 13.76 (13.50, 14.03)              |
| Trend p value            | <0.001                            | <0.001                            |
| Adjusted <sup>3</sup>    |                                   |                                   |
| Low                      | 13.39 (13.18, 13.60)              | 13.23 (13.07, 13.39)              |
| Medium                   | 13.48 (13.34, 13.63)              | 13.40 (13.18, 13.62)              |
| High                     | 13.62 (13.45, 13.80)              | 13.40 (13.16, 13.64)              |
| Very high                | 13.76 (13.57, 13.96)              | 13.69 (13.43, 13.95)              |
| Trend p value            | <0.001                            | <0.001                            |

<sup>1</sup> Cholesterol quartiles are as follows: HDL-C (low [ $\leq 41.83$  mg/dL]; medium [ $>41.83$ – $51.38$  mg/dL]; high [ $>51.38$ – $62.93$  mg/dL]; and very high [ $>62.93$  mg/dL]), and non-HDL-C (low [ $\leq 114.42$  mg/dL]; medium [ $>114.42$ – $140.1$  mg/dL]; high [ $>140.1$ – $168.28$  mg/dL]; and very high [ $>168.28$  mg/dL]).

<sup>2</sup> Unadjusted model.

<sup>3</sup> Adjusted for age, race/ethnicity, gender, smoking and BMI.

**Supplementary Table 11. Geometric Mean of Hemoglobin Concentration by Quartile of Cholesterol Measures in Males<sup>1</sup>**

| NHANES Survey            | 2005-2006                         | 2007-2008                         |
|--------------------------|-----------------------------------|-----------------------------------|
|                          | Hemoglobin (g/dL)<br>Mean (95%CI) | Hemoglobin (g/dL)<br>Mean (95%CI) |
|                          | N = 2148                          | N = 2608                          |
| <b>HDL-C (mg/dL)</b>     |                                   |                                   |
| Unadjusted <sup>2</sup>  |                                   |                                   |
| Low                      | 15.47 (15.35, 15.60)              | 15.41 (15.22, 15.60)              |
| Medium                   | 15.31 (15.15, 15.47)              | 15.21 (14.97, 15.46)              |
| High                     | 15.16 (14.95, 15.38)              | 15.22 (14.97, 15.46)              |
| Very high                | 15.15 (14.98, 15.32)              | 15.07 (14.82, 15.33)              |
| Trend p value            | 0.002                             | 0.001                             |
| Adjusted <sup>3</sup>    |                                   |                                   |
| Low                      | 15.39 (15.26, 15.52)              | 15.33 (15.12, 15.54)              |
| Medium                   | 15.34 (15.17, 15.50)              | 15.26 (15.01, 15.51)              |
| High                     | 15.23 (15.04, 15.43)              | 15.26 (15.02, 15.51)              |
| Very high                | 15.23 (15.09, 15.37)              | 15.20 (14.97, 15.44)              |
| Trend p value            | 0.046                             | 0.095                             |
| <b>Non-HDL-C (mg/dL)</b> |                                   |                                   |
| Unadjusted <sup>2</sup>  |                                   |                                   |
| Low                      | 15.02 (14.87, 15.17)              | 14.83 (14.61, 15.06)              |
| Medium                   | 15.21 (14.99, 15.44)              | 15.13 (14.83, 15.44)              |
| High                     | 15.38 (15.25, 15.52)              | 15.42 (15.19, 15.65)              |
| Very high                | 15.58 (15.43, 15.73)              | 15.63 (15.49, 15.77)              |
| Trend p value            | <0.001                            | <0.001                            |
| Adjusted <sup>3</sup>    |                                   |                                   |
| Low                      | 15.04 (14.89, 15.20)              | 14.88 (14.68, 15.08)              |
| Medium                   | 15.24 (15.06, 15.42)              | 15.16 (14.84, 15.49)              |
| High                     | 15.40 (15.29, 15.52)              | 15.40 (15.15, 15.64)              |
| Very high                | 15.55 (15.39, 15.70)              | 15.60 (15.47, 15.73)              |
| Trend p value            | <0.001                            | <0.001                            |

<sup>1</sup> Cholesterol quartiles are as follows: HDL-C (low [ $\leq 41.83$  mg/dL]; medium [ $>41.83$ – $51.38$  mg/dL]; high [ $>51.38$ – $62.93$  mg/dL]; and very high [ $>62.93$  mg/dL]), and non-HDL-C (low [ $\leq 114.42$  mg/dL]; medium [ $>114.42$ – $140.1$  mg/dL]; high [ $>140.1$ – $168.28$  mg/dL]; and very high [ $>168.28$  mg/dL]).

<sup>2</sup> Unadjusted model.

<sup>3</sup> Adjusted for age, race/ethnicity, gender, smoking and BMI.

**Supplementary Table 12. Mean Erythrocyte Count by Quartile of Cholesterol Measures in Females<sup>1</sup>**

| NHANES Survey            | 2005-2006                       | 2007-2008                       |
|--------------------------|---------------------------------|---------------------------------|
|                          | RBC (million/uL)<br>Mean(95%CI) | RBC (million/uL)<br>Mean(95%CI) |
|                          | N = 2321                        | N = 2710                        |
| <b>HDL-C (mg/dL)</b>     |                                 |                                 |
| Unadjusted <sup>2</sup>  |                                 |                                 |
| Low                      | 4.62 (4.56, 4.68)               | 4.53 (4.49, 4.57)               |
| Medium                   | 4.54 (4.49, 4.59)               | 4.52 (4.47, 4.58)               |
| High                     | 4.53 (4.48, 4.58)               | 4.46 (4.41, 4.51)               |
| Very high                | 4.40 (4.35, 4.46)               | 4.39 (4.32, 4.46)               |
| Trend p value            | <0.001                          | <0.001                          |
| Adjusted <sup>3</sup>    |                                 |                                 |
| Low                      | 4.59 (4.52, 4.65)               | 4.47 (4.43, 4.51)               |
| Medium                   | 4.52 (4.46, 4.58)               | 4.50 (4.44, 4.56)               |
| High                     | 4.53 (4.48, 4.58)               | 4.46 (4.41, 4.50)               |
| Very high                | 4.43 (4.37, 4.48)               | 4.44 (4.38, 4.50)               |
| Trend p value            | 0.001                           | 0.148                           |
| <b>Non-HDL-C (mg/dL)</b> |                                 |                                 |
| Unadjusted <sup>2</sup>  |                                 |                                 |
| Low                      | 4.43 (4.37, 4.50)               | 4.36 (4.32, 4.41)               |
| Medium                   | 4.45 (4.39, 4.51)               | 4.46 (4.40, 4.52)               |
| High                     | 4.53 (4.48, 4.58)               | 4.49 (4.42, 4.55)               |
| Very high                | 4.58 (4.52, 4.64)               | 4.55 (4.49, 4.61)               |
| Trend p value            | <0.001                          | <0.001                          |
| Adjusted <sup>3</sup>    |                                 |                                 |
| Low                      | 4.45 (4.39, 4.52)               | 4.39 (4.35, 4.43)               |
| Medium                   | 4.46 (4.40, 4.52)               | 4.46 (4.40, 4.52)               |
| High                     | 4.52 (4.47, 4.57)               | 4.48 (4.42, 4.54)               |
| Very high                | 4.56 (4.50, 4.63)               | 4.54 (4.47, 4.61)               |
| Trend p value            | 0.001                           | <0.001                          |

<sup>1</sup> Cholesterol quartiles are as follows: HDL-C (low [ $\leq 41.83$  mg/dL]; medium [ $>41.83$ – $51.38$  mg/dL]; high [ $>51.38$ – $62.93$  mg/dL]; and very high [ $>62.93$  mg/dL]), and non-HDL-C (low [ $\leq 114.42$  mg/dL]; medium [ $>114.42$ – $140.1$  mg/dL]; high [ $>140.1$ – $168.28$  mg/dL]; and very high [ $>168.28$  mg/dL]).

<sup>2</sup> Unadjusted model.

<sup>3</sup> Adjusted for age, race/ethnicity, gender, smoking and BMI.

**Supplementary Table 13. Mean Erythrocyte Count by Quartile of Cholesterol Measures in Males<sup>1</sup>**

| NHANES Survey            | 2005-2006                       | 2007-2008                       |
|--------------------------|---------------------------------|---------------------------------|
|                          | RBC (million/uL)<br>Mean(95%CI) | RBC (million/uL)<br>Mean(95%CI) |
|                          | N = 2148                        | N = 2608                        |
| <b>HDL-C (mg/dL)</b>     |                                 |                                 |
| Unadjusted <sup>2</sup>  |                                 |                                 |
| Low                      | 5.10 (5.06, 5.15)               | 5.03 (5.00, 5.07)               |
| Medium                   | 5.02 (4.95, 5.08)               | 4.97 (4.92, 5.02)               |
| High                     | 4.95 (4.89, 5.01)               | 4.92 (4.84, 4.99)               |
| Very high                | 4.83 (4.77, 4.88)               | 4.83 (4.73, 4.93)               |
| Trend p value            | <0.001                          | <0.001                          |
| Adjusted <sup>3</sup>    |                                 |                                 |
| Low                      | 5.06 (5.02, 5.11)               | 5.01 (4.96, 5.05)               |
| Medium                   | 5.02 (4.95, 5.08)               | 4.98 (4.92, 5.04)               |
| High                     | 4.98 (4.93, 5.03)               | 4.93 (4.85, 5.01)               |
| Very high                | 4.89 (4.84, 4.94)               | 4.87 (4.79, 4.96)               |
| Trend p value            | <0.001                          | <0.001                          |
| <b>Non-HDL-C (mg/dL)</b> |                                 |                                 |
| Unadjusted <sup>2</sup>  |                                 |                                 |
| Low                      | 4.92 (4.86, 4.97)               | 4.83 (4.76, 4.90)               |
| Medium                   | 4.97 (4.88, 5.06)               | 4.94 (4.88, 5.01)               |
| High                     | 5.04 (4.98, 5.11)               | 5.01 (4.96, 5.07)               |
| Very high                | 5.08 (5.04, 5.12)               | 5.06 (5.03, 5.09)               |
| Trend p value            | <0.001                          | <0.001                          |
| Adjusted <sup>3</sup>    |                                 |                                 |
| Low                      | 4.93 (4.87, 4.98)               | 4.85 (4.79, 4.91)               |
| Medium                   | 4.98 (4.91, 5.04)               | 4.95 (4.87, 5.03)               |
| High                     | 5.04 (5.00, 5.09)               | 5.00 (4.94, 5.07)               |
| Very high                | 5.07 (5.02, 5.11)               | 5.05 (5.02, 5.08)               |
| Trend p value            | <0.001                          | <0.001                          |

<sup>1</sup> Cholesterol quartiles are as follows: HDL-C (low [ $\leq$ 41.83 mg/dL]; medium [ $>$ 41.83–51.38 mg/dL]; high [ $>$ 51.38–62.93 mg/dL]; and very high [ $>$ 62.93 mg/dL]), and non-HDL-C (low [ $\leq$ 114.42 mg/dL]; medium [ $>$ 114.42–140.1 mg/dL]; high [ $>$ 140.1–168.28 mg/dL]; and very high [ $>$ 168.28 mg/dL]).

<sup>2</sup> Unadjusted model.

<sup>3</sup> Adjusted for age, race/ethnicity, gender, smoking and BMI.

**Supplementary Table 14. Geometric Mean Platelet Count by Quartile of Cholesterol Measures in Females<sup>1</sup>**

| NHANES Survey            | 2005-2006                                | 2007-2008                                |
|--------------------------|------------------------------------------|------------------------------------------|
|                          | Platelet (1000 cells/uL)<br>Mean (95%CI) | Platelet (1000 cells/uL)<br>Mean (95%CI) |
|                          | N = 2321                                 | N = 2710                                 |
| <b>HDL-C (mg/dL)</b>     |                                          |                                          |
| Unadjusted <sup>2</sup>  |                                          |                                          |
| Low                      | 301.84 (293.97, 309.91)                  | 275.33 (268.43, 282.39)                  |
| Medium                   | 295.35 (284.00, 307.15)                  | 278.42 (272.59, 284.38)                  |
| High                     | 290.42 (281.36, 299.78)                  | 275.21 (269.33, 281.21)                  |
| Very high                | 278.78 (272.62, 285.07)                  | 264.73 (258.62, 270.99)                  |
| Trend p value            | <0.001                                   | 0.002                                    |
| Adjusted <sup>3</sup>    |                                          |                                          |
| Low                      | 295.19 (286.38, 304.27)                  | 268.35 (261.66, 275.22)                  |
| Medium                   | 291.95 (281.66, 302.62)                  | 273.81 (267.30, 280.48)                  |
| High                     | 289.57 (280.99, 298.42)                  | 275.14 (269.87, 280.52)                  |
| Very high                | 282.83 (277.09, 288.68)                  | 270.46 (263.44, 277.67)                  |
| Trend p value            | 0.011                                    | 0.822                                    |
| <b>Non-HDL-C (mg/dL)</b> |                                          |                                          |
| Unadjusted <sup>2</sup>  |                                          |                                          |
| Low                      | 273.00 (262.78, 283.61)                  | 255.81 (251.15, 260.55)                  |
| Medium                   | 288.26 (279.87, 296.91)                  | 272.19 (265.09, 279.49)                  |
| High                     | 294.84 (287.91, 301.94)                  | 278.31 (273.64, 283.05)                  |
| Very high                | 299.86 (290.51, 309.52)                  | 285.58 (281.49, 289.73)                  |
| Trend p value            | <0.001                                   | <0.001                                   |
| Adjusted <sup>3</sup>    |                                          |                                          |
| Low                      | 273.03 (262.72, 283.75)                  | 255.81 (251.20, 260.50)                  |
| Medium                   | 287.97 (279.75, 296.43)                  | 271.73 (264.55, 279.11)                  |
| High                     | 295.22 (287.85, 302.79)                  | 278.48 (273.84, 283.19)                  |
| Very high                | 299.08 (290.39, 308.03)                  | 284.58 (280.26, 288.97)                  |
| Trend p value            | <0.001                                   | <0.001                                   |

<sup>1</sup> Cholesterol quartiles are as follows: HDL-C (low [ $\leq 41.83$  mg/dL]; medium [ $>41.83$ – $51.38$  mg/dL]; high [ $>51.38$ – $62.93$  mg/dL]; and very high [ $>62.93$  mg/dL]), and non-HDL-C (low [ $\leq 114.42$  mg/dL]; medium [ $>114.42$ – $140.1$  mg/dL]; high [ $>140.1$ – $168.28$  mg/dL]; and very high [ $>168.28$  mg/dL]).

<sup>2</sup> Unadjusted model.

<sup>3</sup> Adjusted for age, race/ethnicity, gender, smoking and BMI.

**Supplementary Table 15. Geometric Mean Platelet Count by Quartile of Cholesterol Measures in Males<sup>1</sup>**

| NHANES Survey            | 2005-2006                                | 2007-2008                                |
|--------------------------|------------------------------------------|------------------------------------------|
|                          | Platelet (1000 cells/uL)<br>Mean (95%CI) | Platelet (1000 cells/uL)<br>Mean (95%CI) |
| <b>Total</b>             | N = 2148                                 | N = 2608                                 |
| <b>HDL-C (mg/dL)</b>     |                                          |                                          |
| Unadjusted <sup>2</sup>  |                                          |                                          |
| Low                      | 256.32 (250.07, 262.73)                  | 245.21 (239.61, 250.95)                  |
| Medium                   | 257.16 (252.47, 261.94)                  | 244.03 (240.23, 247.89)                  |
| High                     | 249.09 (242.28, 256.09)                  | 240.19 (232.31, 248.33)                  |
| Very high                | 259.03 (252.26, 265.98)                  | 244.27 (237.56, 251.16)                  |
| Trend p value            | 0.818                                    | 0.394                                    |
| Adjusted <sup>3</sup>    |                                          |                                          |
| Low                      | 252.88 (246.92, 258.98)                  | 243.03 (238.05, 248.12)                  |
| Medium                   | 257.62 (253.27, 262.04)                  | 245.27 (241.56, 249.03)                  |
| High                     | 251.88 (245.53, 258.39)                  | 240.34 (230.48, 250.62)                  |
| Very high                | 263.57 (255.73, 271.65)                  | 246.07 (238.54, 253.84)                  |
| Trend p value            | 0.196                                    | 0.945                                    |
| <b>Non-HDL-C (mg/dL)</b> |                                          |                                          |
| Unadjusted <sup>2</sup>  |                                          |                                          |
| Low                      | 243.34 (235.88, 251.03)                  | 230.10 (224.42, 235.92)                  |
| Medium                   | 251.28 (247.59, 255.04)                  | 239.26 (233.46, 245.21)                  |
| High                     | 263.06 (257.10, 269.17)                  | 249.65 (243.29, 256.18)                  |
| Very high                | 263.12 (258.83, 267.47)                  | 253.81 (248.17, 259.58)                  |
| Trend p value            | <0.001                                   | <0.001                                   |
| Adjusted <sup>3</sup>    |                                          |                                          |
| Low                      | 242.89 (234.92, 251.14)                  | 230.24 (223.66, 237.01)                  |
| Medium                   | 251.91 (248.95, 254.91)                  | 240.56 (234.42, 246.87)                  |
| High                     | 264.00 (258.88, 269.23)                  | 248.92 (242.83, 255.16)                  |
| Very high                | 262.61 (258.12, 267.19)                  | 252.18 (246.56, 257.93)                  |
| Trend p value            | <0.001                                   | <0.001                                   |

<sup>1</sup> Cholesterol quartiles are as follows: HDL-C (low [ $\leq 41.83$  mg/dL]; medium [ $>41.83$ – $51.38$  mg/dL]; high [ $>51.38$ – $62.93$  mg/dL]; and very high [ $>62.93$  mg/dL]), and non-HDL-C (low [ $\leq 114.42$  mg/dL]; medium [ $>114.42$ – $140.1$  mg/dL]; high [ $>140.1$ – $168.28$  mg/dL]; and very high [ $>168.28$  mg/dL]).

<sup>2</sup> Unadjusted model.

<sup>3</sup> Adjusted for age, race/ethnicity, gender, smoking and BMI.



**Supplementary Table 16. Erythrocyte Mean Corpuscular Volume by Quartile of Cholesterol Measures in Females<sup>1</sup>**

| NHANES Survey            | 2005-2006                             | 2007-2008                             |
|--------------------------|---------------------------------------|---------------------------------------|
|                          | Mean cell volume (fL)<br>Mean (95%CI) | Mean cell volume (fL)<br>Mean (95%CI) |
|                          | N = 2321                              | N = 2710                              |
| <b>HDL-C (mg/dL)</b>     |                                       |                                       |
| Unadjusted <sup>2</sup>  |                                       |                                       |
| Low                      | 87.78 (86.89, 88.68)                  | 87.17 (86.39, 87.94)                  |
| Medium                   | 88.24 (87.38, 89.10)                  | 87.61 (87.05, 88.17)                  |
| High                     | 89.61 (89.00, 90.23)                  | 88.15 (87.38, 88.93)                  |
| Very high                | 91.20 (90.80, 91.61)                  | 88.99 (88.01, 89.97)                  |
| Trend p value            | <0.001                                | <0.001                                |
| Adjusted <sup>3</sup>    |                                       |                                       |
| Low                      | 87.92 (86.96, 88.87)                  | 87.48 (86.78, 88.18)                  |
| Medium                   | 88.50 (87.68, 89.32)                  | 87.90 (87.34, 88.45)                  |
| High                     | 89.77 (89.25, 90.29)                  | 88.20 (87.34, 89.06)                  |
| Very high                | 90.92 (90.59, 91.25)                  | 88.63 (87.68, 89.57)                  |
| Trend p value            | <0.001                                | 0.004                                 |
| <b>Non-HDL-C (mg/dL)</b> |                                       |                                       |
| Unadjusted <sup>2</sup>  |                                       |                                       |
| Low                      | 89.78 (89.06, 90.50)                  | 88.26 (87.33, 89.20)                  |
| Medium                   | 89.82 (89.17, 90.46)                  | 88.03 (87.09, 88.97)                  |
| High                     | 89.59 (88.88, 90.31)                  | 87.86 (87.23, 88.50)                  |
| Very high                | 89.66 (88.73, 90.58)                  | 88.42 (87.73, 89.11)                  |
| Trend p value            | 0.698                                 | 0.823                                 |
| Adjusted <sup>3</sup>    |                                       |                                       |
| Low                      | 89.87 (89.17, 90.57)                  | 88.40 (87.55, 89.25)                  |
| Medium                   | 89.87 (89.32, 90.42)                  | 88.12 (87.26, 88.97)                  |
| High                     | 89.53 (88.74, 90.33)                  | 87.87 (87.15, 88.60)                  |
| Very high                | 89.60 (88.79, 90.41)                  | 88.20 (87.51, 88.89)                  |
| Trend p value            | 0.400                                 | 0.407                                 |

<sup>1</sup> Cholesterol quartiles are as follows: HDL-C (low [ $\leq 41.83$  mg/dL]; medium [ $>41.83$ – $51.38$  mg/dL]; high [ $>51.38$ – $62.93$  mg/dL]; and very high [ $>62.93$  mg/dL]), and non-HDL-C (low [ $\leq 114.42$  mg/dL]; medium [ $>114.42$ – $140.1$  mg/dL]; high [ $>140.1$ – $168.28$  mg/dL]; and very high [ $>168.28$  mg/dL]).

<sup>2</sup> Unadjusted model.

<sup>3</sup> Adjusted for age, race/ethnicity, gender, smoking and BMI.

**Supplementary Table 17. Erythrocyte Mean Corpuscular Volume by Quartile of Cholesterol Measures in Males<sup>1</sup>**

| NHANES Survey            | 2005-2006                             | 2007-2008                             |
|--------------------------|---------------------------------------|---------------------------------------|
|                          | Mean cell volume (fL)<br>Mean (95%CI) | Mean cell volume (fL)<br>Mean (95%CI) |
| <b>Total</b>             | N = 2148                              | N = 2608                              |
| <b>HDL-C (mg/dL)</b>     |                                       |                                       |
| Unadjusted <sup>2</sup>  |                                       |                                       |
| Low                      | 89.58 (89.14, 90.01)                  | 88.34 (87.67, 89.01)                  |
| Medium                   | 90.55 (90.04, 91.05)                  | 88.91 (88.20, 89.62)                  |
| High                     | 91.09 (90.45, 91.72)                  | 90.11 (89.22, 91.01)                  |
| Very high                | 93.17 (92.32, 94.01)                  | 91.13 (90.19, 92.07)                  |
| Trend p value            | <0.001                                | <0.001                                |
| Adjusted <sup>3</sup>    |                                       |                                       |
| Low                      | 89.94 (89.52, 90.37)                  | 88.49 (87.86, 89.13)                  |
| Medium                   | 90.67 (90.17, 91.16)                  | 88.90 (88.19, 89.62)                  |
| High                     | 90.95 (90.32, 91.57)                  | 90.00 (89.19, 90.81)                  |
| Very high                | 92.39 (91.54, 93.23)                  | 90.78 (90.01, 91.55)                  |
| Trend p value            | <0.001                                | <0.001                                |
| <b>Non-HDL-C (mg/dL)</b> |                                       |                                       |
| Unadjusted <sup>2</sup>  |                                       |                                       |
| Low                      | 91.02 (90.15, 91.89)                  | 89.72 (88.77, 90.67)                  |
| Medium                   | 90.90 (90.19, 91.61)                  | 89.02 (88.14, 89.91)                  |
| High                     | 90.24 (89.71, 90.78)                  | 89.08 (88.46, 89.70)                  |
| Very high                | 90.65 (90.10, 91.20)                  | 88.86 (88.21, 89.51)                  |
| Trend p value            | 0.270                                 | 0.017                                 |
| Adjusted <sup>3</sup>    |                                       |                                       |
| Low                      | 90.86 (90.13, 91.58)                  | 89.54 (88.58, 90.50)                  |
| Medium                   | 90.89 (90.20, 91.59)                  | 89.01 (88.19, 89.82)                  |
| High                     | 90.36 (89.85, 90.87)                  | 89.19 (88.60, 89.77)                  |
| Very high                | 90.79 (90.20, 91.37)                  | 88.93 (88.36, 89.50)                  |
| Trend p value            | 0.601                                 | 0.099                                 |

<sup>1</sup> Cholesterol quartiles are as follows: HDL-C (low [ $\leq 41.83$  mg/dL]; medium [ $>41.83$ – $51.38$  mg/dL]; high [ $>51.38$ – $62.93$  mg/dL]; and very high [ $>62.93$  mg/dL]), and non-HDL-C (low [ $\leq 114.42$  mg/dL]; medium [ $>114.42$ – $140.1$  mg/dL]; high [ $>140.1$ – $168.28$  mg/dL]; and very high [ $>168.28$  mg/dL]).

<sup>2</sup> Unadjusted model.

<sup>3</sup> Adjusted for age, race/ethnicity, gender, smoking and BMI.

**Supplementary Table 18. Fasting status<sup>1</sup> of NHANES 2005-2006 and 2007-2008 study populations by serum cholesterol quartile<sup>2</sup>**

|                          | 2005-2006  | 2007-2008  |
|--------------------------|------------|------------|
|                          | % Fasting  | % Fasting  |
| <b>HDL-C (mg/dL)</b>     |            |            |
| Low                      | 42.5 (1.8) | 37.3 (2.2) |
| Medium                   | 44.4 (1.1) | 48.5 (1.7) |
| High                     | 48.3 (1.6) | 51.3 (1.9) |
| Very high                | 49.0 (1.8) | 49.0 (1.6) |
| Trend p value            | 0.017      | <0.001     |
| <b>Non-HDL-C (mg/dL)</b> |            |            |
| Low                      | 47.5 (1.4) | 48.6 (1.4) |
| Medium                   | 46.0 (1.7) | 49.3 (2.2) |
| High                     | 47.4 (1.3) | 47.3 (2.6) |
| Very high                | 43.8 (1.2) | 39.7 (2.2) |
| Trend p value            | 0.204      | 0.002      |

<sup>1</sup> Fasting refers to a duration of  $\geq 9$  hours.

<sup>2</sup> Cholesterol quartiles are as follows: HDL-C (low [ $\leq 41.83$  mg/dL]; medium [ $>41.83$ – $51.38$  mg/dL]; high [ $>51.38$ – $62.93$  mg/dL]; and very high [ $>62.93$  mg/dL]), and non-HDL-C (low [ $\leq 114.42$  mg/dL]; medium [ $>114.42$ – $140.1$  mg/dL]; high [ $>140.1$ – $168.28$  mg/dL]; and very high [ $>168.28$  mg/dL]).

**Supplementary Table 19. Mean hematocrit by serum cholesterol quartile<sup>1</sup> among fasting subjects<sup>2</sup> in NHANES 2005-2006 and 2007-2008 study populations**

|                          | 2005-2006                      | 2007-2008                      |
|--------------------------|--------------------------------|--------------------------------|
|                          | Hematocrit (%)<br>Mean (95%CI) | Hematocrit (%)<br>Mean (95%CI) |
| <b>Total</b>             | N = 1892                       | N = 2288                       |
| <b>HDL-C (mg/dL)</b>     |                                |                                |
| Unadjusted <sup>3</sup>  |                                |                                |
| Low                      | 44.91 (44.32, 45.51)           | 43.18 (42.70, 43.65)           |
| Medium                   | 43.69 (42.94, 44.43)           | 42.17 (41.53, 42.81)           |
| High                     | 42.53 (41.84, 43.22)           | 41.76 (41.01, 42.51)           |
| Very high                | 41.84 (41.21, 42.47)           | 40.33 (39.45, 41.22)           |
| Trend p value            | <0.001                         | <0.001                         |
| Adjusted <sup>4</sup>    |                                |                                |
| Low                      | 43.35 (42.78, 43.93)           | 41.81 (41.43, 42.20)           |
| Medium                   | 43.12 (42.42, 43.81)           | 41.66 (41.04, 42.28)           |
| High                     | 43.31 (42.68, 43.95)           | 42.00 (41.44, 42.56)           |
| Very high                | 42.78 (42.26, 43.30)           | 41.91 (41.22, 42.60)           |
| Trend p value            | 0.052                          | 0.420                          |
| <b>Non-HDL-C (mg/dL)</b> |                                |                                |
| Unadjusted <sup>3</sup>  |                                |                                |
| Low                      | 42.19 (41.61, 42.77)           | 40.70 (40.10, 41.29)           |
| Medium                   | 42.88 (42.19, 43.57)           | 41.72 (41.14, 42.30)           |
| High                     | 43.48 (42.72, 44.24)           | 42.23 (41.42, 43.05)           |
| Very high                | 43.87 (43.35, 44.39)           | 42.96 (42.39, 43.53)           |
| Trend p value            | <0.001                         | <0.001                         |
| Adjusted <sup>4</sup>    |                                |                                |
| Low                      | 42.54 (41.91, 43.17)           | 40.82 (40.35, 41.28)           |
| Medium                   | 42.94 (42.41, 43.47)           | 41.79 (41.29, 42.30)           |
| High                     | 43.41 (42.85, 43.97)           | 42.18 (41.52, 42.85)           |
| Very high                | 43.67 (43.12, 44.21)           | 42.76 (42.17, 43.35)           |
| Trend p value            | <0.001                         | <0.001                         |

<sup>1</sup> Cholesterol quartiles are as follows: HDL-C (low [ $\leq$ 41.83 mg/dL]; medium [ $>$ 41.83–51.38 mg/dL]; high [ $>$ 51.38–62.93 mg/dL]; and very high [ $>$ 62.93 mg/dL]), and non-HDL-C (low [ $\leq$ 114.42 mg/dL]; medium [ $>$ 114.42–140.1 mg/dL]; high [ $>$ 140.1–168.28 mg/dL]; and very high [ $>$ 168.28 mg/dL]).

<sup>2</sup> Fasting refers to a duration of  $\geq$ 9 hours.

<sup>3</sup> Unadjusted model.

<sup>4</sup> Adjusted for age, race/ethnicity, gender, smoking and BMI.

**Supplementary Table 20. Geometric mean hemoglobin by serum cholesterol quartile<sup>1</sup> among fasting subjects<sup>2</sup> in NHANES 2005-2006 and 2007-2008 study populations**

|                          | 2005-2006                         | 2007-2008                         |
|--------------------------|-----------------------------------|-----------------------------------|
|                          | Hemoglobin (g/dL)<br>Mean (95%CI) | Hemoglobin (g/dL)<br>Mean (95%CI) |
| <b>Total</b>             | N = 1892                          | N = 2288                          |
| <b>HDL-C (mg/dL)</b>     |                                   |                                   |
| Unadjusted <sup>3</sup>  |                                   |                                   |
| Low                      | 15.12 (14.92, 15.32)              | 14.87 (14.66, 15.08)              |
| Medium                   | 14.66 (14.42, 14.91)              | 14.41 (14.15, 14.68)              |
| High                     | 14.22 (14.00, 14.44)              | 14.27 (14.00, 14.56)              |
| Very high                | 14.08 (13.87, 14.29)              | 13.75 (13.45, 14.07)              |
| Trend p value            | <0.001                            | <0.001                            |
| Adjusted <sup>4</sup>    |                                   |                                   |
| Low                      | 14.56 (14.39, 14.73)              | 14.33 (14.15, 14.52)              |
| Medium                   | 14.46 (14.24, 14.69)              | 14.24 (13.99, 14.48)              |
| High                     | 14.50 (14.32, 14.69)              | 14.36 (14.15, 14.57)              |
| Very high                | 14.39 (14.24, 14.55)              | 14.34 (14.10, 14.59)              |
| Trend p value            | 0.147                             | 0.577                             |
| <b>Non-HDL-C (mg/dL)</b> |                                   |                                   |
| Unadjusted <sup>3</sup>  |                                   |                                   |
| Low                      | 14.13 (13.91, 14.35)              | 13.89 (13.68, 14.10)              |
| Medium                   | 14.41 (14.19, 14.63)              | 14.27 (14.03, 14.51)              |
| High                     | 14.61 (14.36, 14.88)              | 14.44 (14.14, 14.74)              |
| Very high                | 14.73 (14.54, 14.91)              | 14.77 (14.51, 15.04)              |
| Trend p value            | <0.001                            | <0.001                            |
| Adjusted <sup>4</sup>    |                                   |                                   |
| Low                      | 14.26 (14.09, 14.44)              | 13.94 (13.77, 14.11)              |
| Medium                   | 14.42 (14.28, 14.56)              | 14.29 (14.08, 14.50)              |
| High                     | 14.59 (14.41, 14.78)              | 14.42 (14.18, 14.66)              |
| Very high                | 14.65 (14.50, 14.79)              | 14.70 (14.45, 14.95)              |
| Trend p value            | <0.001                            | <0.001                            |

<sup>1</sup> Cholesterol quartiles are as follows: HDL-C (low [ $\leq 41.83$  mg/dL]; medium [ $>41.83$ – $51.38$  mg/dL]; high [ $>51.38$ – $62.93$  mg/dL]; and very high [ $>62.93$  mg/dL]), and non-HDL-C (low [ $\leq 114.42$  mg/dL]; medium [ $>114.42$ – $140.1$  mg/dL]; high [ $>140.1$ – $168.28$  mg/dL]; and very high [ $>168.28$  mg/dL]).

<sup>2</sup> Fasting refers to a duration of  $\geq 9$  hours.

<sup>3</sup> Unadjusted model.

<sup>4</sup> Adjusted for age, race/ethnicity, gender, smoking and BMI.

**Supplementary Table 21. Mean erythrocyte count by serum cholesterol quartile<sup>1</sup> among fasting subjects<sup>2</sup> in NHANES 2005-2006 and 2007-2008 study populations**

|                          | 2005-2006                       | 2007-2008                       |
|--------------------------|---------------------------------|---------------------------------|
|                          | RBC (million/uL)<br>Mean(95%CI) | RBC (million/uL)<br>Mean(95%CI) |
| <b>Total</b>             | N = 1892                        | N = 2288                        |
| <b>HDL-C (mg/dL)</b>     |                                 |                                 |
| Unadjusted <sup>3</sup>  |                                 |                                 |
| Low                      | 5.03 (4.95, 5.11)               | 4.92 (4.87, 4.96)               |
| Medium                   | 4.88 (4.80, 4.96)               | 4.80 (4.74, 4.87)               |
| High                     | 4.74 (4.67, 4.81)               | 4.70 (4.63, 4.78)               |
| Very high                | 4.54 (4.48, 4.61)               | 4.52 (4.42, 4.62)               |
| Trend p value            | <0.001                          | <0.001                          |
| Adjusted <sup>4</sup>    |                                 |                                 |
| Low                      | 4.86 (4.78, 4.94)               | 4.77 (4.73, 4.81)               |
| Medium                   | 4.82 (4.75, 4.89)               | 4.75 (4.69, 4.81)               |
| High                     | 4.81 (4.75, 4.87)               | 4.73 (4.67, 4.79)               |
| Very high                | 4.66 (4.60, 4.72)               | 4.69 (4.60, 4.77)               |
| Trend p value            | <0.001                          | 0.026                           |
| <b>Non-HDL-C (mg/dL)</b> |                                 |                                 |
| Unadjusted <sup>3</sup>  |                                 |                                 |
| Low                      | 4.67 (4.60, 4.74)               | 4.61 (4.55, 4.67)               |
| Medium                   | 4.74 (4.67, 4.82)               | 4.72 (4.64, 4.79)               |
| High                     | 4.84 (4.75, 4.93)               | 4.78 (4.68, 4.88)               |
| Very high                | 4.85 (4.79, 4.92)               | 4.85 (4.79, 4.91)               |
| Trend p value            | <0.001                          | <0.001                          |
| Adjusted <sup>4</sup>    |                                 |                                 |
| Low                      | 4.71 (4.63, 4.78)               | 4.62 (4.58, 4.66)               |
| Medium                   | 4.75 (4.69, 4.82)               | 4.72 (4.66, 4.79)               |
| High                     | 4.82 (4.76, 4.88)               | 4.77 (4.69, 4.86)               |
| Very high                | 4.83 (4.76, 4.90)               | 4.84 (4.78, 4.89)               |
| Trend p value            | 0.002                           | <0.001                          |

<sup>1</sup> Cholesterol quartiles are as follows: HDL-C (low [ $\leq$ 41.83 mg/dL]; medium [ $>$ 41.83–51.38 mg/dL]; high [ $>$ 51.38–62.93 mg/dL]; and very high [ $>$ 62.93 mg/dL]), and non-HDL-C (low [ $\leq$ 114.42 mg/dL]; medium [ $>$ 114.42–140.1 mg/dL]; high [ $>$ 140.1–168.28 mg/dL]; and very high [ $>$ 168.28 mg/dL]).

<sup>2</sup> Fasting refers to a duration of  $\geq$ 9 hours.

<sup>3</sup> Unadjusted model.

<sup>4</sup> Adjusted for age, race/ethnicity, gender, smoking and BMI.

**Supplementary Table 22. Erythrocyte mean corpuscular volume by serum cholesterol quartile<sup>1</sup> among fasting subjects<sup>2</sup> in NHANES 2005-2006 and 2007-2008 study populations**

|                          | 2005-2006                             | 2007-2008                             |
|--------------------------|---------------------------------------|---------------------------------------|
|                          | Mean cell volume (fL)<br>Mean (95%CI) | Mean cell volume (fL)<br>Mean (95%CI) |
| <b>Total</b>             | N = 1892                              | N = 2288                              |
| <b>HDL-C (mg/dL)</b>     |                                       |                                       |
| Unadjusted <sup>3</sup>  |                                       |                                       |
| Low                      | 89.41 (88.70, 90.12)                  | 88.00 (87.23, 88.77)                  |
| Medium                   | 89.63 (88.91, 90.35)                  | 87.95 (87.26, 88.64)                  |
| High                     | 89.78 (89.01, 90.55)                  | 88.87 (87.91, 89.82)                  |
| Very high                | 92.27 (91.60, 92.95)                  | 89.45 (88.40, 90.50)                  |
| Trend p value            | <0.001                                | 0.001                                 |
| Adjusted <sup>4</sup>    |                                       |                                       |
| Low                      | 89.38 (88.81, 89.95)                  | 87.85 (87.11, 88.59)                  |
| Medium                   | 89.67 (88.96, 90.39)                  | 87.85 (87.16, 88.55)                  |
| High                     | 90.16 (89.35, 90.97)                  | 88.93 (88.05, 89.81)                  |
| Very high                | 92.06 (91.41, 92.70)                  | 89.64 (88.62, 90.66)                  |
| Trend p value            | <0.001                                | <0.001                                |
| <b>Non-HDL-C (mg/dL)</b> |                                       |                                       |
| Unadjusted <sup>3</sup>  |                                       |                                       |
| Low                      | 90.58 (89.66, 91.50)                  | 88.56 (87.67, 89.45)                  |
| Medium                   | 90.55 (89.51, 91.58)                  | 88.59 (87.52, 89.66)                  |
| High                     | 89.96 (89.33, 90.59)                  | 88.42 (87.79, 89.06)                  |
| Very high                | 90.58 (89.97, 91.20)                  | 88.69 (87.78, 89.59)                  |
| Trend p value            | 0.588                                 | 0.862                                 |
| Adjusted <sup>4</sup>    |                                       |                                       |
| Low                      | 90.69 (89.89, 91.50)                  | 88.55 (87.69, 89.42)                  |
| Medium                   | 90.50 (89.61, 91.40)                  | 88.64 (87.65, 89.62)                  |
| High                     | 90.12 (89.46, 90.78)                  | 88.50 (87.80, 89.20)                  |
| Very high                | 90.49 (89.84, 91.15)                  | 88.56 (87.65, 89.47)                  |
| Trend p value            | 0.433                                 | 0.874                                 |

<sup>1</sup> Cholesterol quartiles are as follows: HDL-C (low [ $\leq 41.83$  mg/dL]; medium [ $>41.83$ – $51.38$  mg/dL]; high [ $>51.38$ – $62.93$  mg/dL]; and very high [ $>62.93$  mg/dL]), and non-HDL-C (low [ $\leq 114.42$  mg/dL]; medium [ $>114.42$ – $140.1$  mg/dL]; high [ $>140.1$ – $168.28$  mg/dL]; and very high [ $>168.28$  mg/dL]).

<sup>2</sup> Fasting refers to a duration of  $\geq 9$  hours.

<sup>3</sup> Unadjusted model.

<sup>4</sup> Adjusted for age, race/ethnicity, gender, smoking and BMI.

**Supplementary Table 23. Geometric mean platelet count by serum cholesterol quartile<sup>1</sup> among fasting subjects<sup>2</sup> in NHANES 2005-2006 and 2007-2008 study populations**

|                          | 2005-2006                               | 2007-2008                               |
|--------------------------|-----------------------------------------|-----------------------------------------|
|                          | Platelet (1000 cells/uL)<br>Mean(95%CI) | Platelet (1000 cells/uL)<br>Mean(95%CI) |
| <b>Total</b>             | N = 1892                                | N = 2288                                |
| <b>HDL-C (mg/dL)</b>     |                                         |                                         |
| Unadjusted <sup>3</sup>  |                                         |                                         |
| Low                      | 263.34 (255.74, 271.16)                 | 249.08 (241.71, 256.68)                 |
| Medium                   | 265.64 (258.93, 272.53)                 | 253.66 (246.98, 260.53)                 |
| High                     | 274.53 (265.51, 283.86)                 | 260.06 (251.44, 268.97)                 |
| Very high                | 270.01 (262.44, 277.80)                 | 258.84 (252.14, 265.72)                 |
| Trend p value            | 0.142                                   | 0.039                                   |
| Adjusted <sup>4</sup>    |                                         |                                         |
| Low                      | 265.30 (256.97, 273.91)                 | 251.15 (242.46, 260.15)                 |
| Medium                   | 267.47 (260.24, 274.91)                 | 255.86 (248.30, 263.64)                 |
| High                     | 271.41 (263.04, 280.06)                 | 258.42 (249.04, 268.15)                 |
| Very high                | 270.30 (262.89, 277.93)                 | 255.19 (245.68, 265.07)                 |
| Trend p value            | 0.413                                   | 0.582                                   |
| <b>Non-HDL-C (mg/dL)</b> |                                         |                                         |
| Unadjusted <sup>3</sup>  |                                         |                                         |
| Low                      | 257.63 (247.51, 268.16)                 | 242.41 (237.23, 247.70)                 |
| Medium                   | 270.29 (261.93, 278.92)                 | 254.25 (247.90, 260.76)                 |
| High                     | 273.26 (264.79, 282.01)                 | 264.42 (259.96, 268.96)                 |
| Very high                | 275.93 (267.17, 284.98)                 | 263.74 (256.38, 271.31)                 |
| Trend p value            | 0.029                                   | <0.001                                  |
| Adjusted <sup>4</sup>    |                                         |                                         |
| Low                      | 254.92 (245.35, 264.87)                 | 240.44 (235.08, 245.91)                 |
| Medium                   | 271.25 (264.58, 278.09)                 | 253.62 (247.57, 259.82)                 |
| High                     | 274.98 (266.36, 283.87)                 | 264.99 (261.12, 268.93)                 |
| Very high                | 276.84 (267.60, 286.41)                 | 265.44 (258.18, 272.90)                 |
| Trend p value            | 0.016                                   | <0.001                                  |

<sup>1</sup> Cholesterol quartiles are as follows: HDL-C (low [ $\leq$ 41.83 mg/dL]; medium [ $>$ 41.83–51.38 mg/dL]; high [ $>$ 51.38–62.93 mg/dL]; and very high [ $>$ 62.93 mg/dL]), and non-HDL-C (low [ $\leq$ 114.42 mg/dL]; medium [ $>$ 114.42–140.1 mg/dL]; high [ $>$ 140.1–168.28 mg/dL]; and very high [ $>$ 168.28 mg/dL]).

<sup>2</sup> Fasting refers to a duration of  $\geq$ 9 hours.

<sup>3</sup> Unadjusted model.

<sup>4</sup> Adjusted for age, race/ethnicity, gender, smoking and BMI.



**Supplementary Table 24. Mean platelet volume by serum cholesterol quartile<sup>1</sup> among fasting subjects<sup>2</sup> in NHANES 2005-2006 and 2007-2008 study populations**

|                          | 2005-2006                                 | 2007-2008                                 |
|--------------------------|-------------------------------------------|-------------------------------------------|
|                          | Mean platelet volume (fL)<br>Mean (95%CI) | Mean platelet volume (fL)<br>Mean (95%CI) |
| <b>Total</b>             | N = 1892                                  | N = 2288                                  |
| <b>HDL-C (mg/dL)</b>     |                                           |                                           |
| Unadjusted <sup>3</sup>  |                                           |                                           |
| Low                      | 8.23 (8.10, 8.35)                         | 7.92 (7.77, 8.07)                         |
| Medium                   | 8.21 (8.14, 8.28)                         | 7.73 (7.62, 7.84)                         |
| High                     | 8.25 (8.15, 8.34)                         | 7.74 (7.59, 7.90)                         |
| Very high                | 8.14 (8.06, 8.21)                         | 7.74 (7.62, 7.86)                         |
| Trend p value            | 0.217                                     | 0.044                                     |
| Adjusted <sup>4</sup>    |                                           |                                           |
| Low                      | 8.26 (8.13, 8.39)                         | 7.91 (7.78, 8.03)                         |
| Medium                   | 8.24 (8.17, 8.30)                         | 7.73 (7.62, 7.85)                         |
| High                     | 8.22 (8.13, 8.32)                         | 7.74 (7.59, 7.89)                         |
| Very high                | 8.13 (8.05, 8.21)                         | 7.75 (7.61, 7.89)                         |
| Trend p value            | 0.059                                     | 0.028                                     |
| <b>Non-HDL-C (mg/dL)</b> |                                           |                                           |
| Unadjusted <sup>3</sup>  |                                           |                                           |
| Low                      | 8.25 (8.15, 8.35)                         | 7.78 (7.65, 7.91)                         |
| Medium                   | 8.17 (8.07, 8.28)                         | 7.79 (7.66, 7.93)                         |
| High                     | 8.12 (8.03, 8.21)                         | 7.74 (7.60, 7.88)                         |
| Very high                | 8.27 (8.19, 8.36)                         | 7.80 (7.64, 7.95)                         |
| Trend p value            | 0.896                                     | 0.998                                     |
| Adjusted <sup>4</sup>    |                                           |                                           |
| Low                      | 8.26 (8.15, 8.36)                         | 7.78 (7.65, 7.91)                         |
| Medium                   | 8.18 (8.08, 8.28)                         | 7.80 (7.66, 7.93)                         |
| High                     | 8.12 (8.03, 8.21)                         | 7.73 (7.60, 7.87)                         |
| Very high                | 8.27 (8.19, 8.36)                         | 7.80 (7.65, 7.95)                         |
| Trend p value            | 0.832                                     | 0.944                                     |

<sup>1</sup> Cholesterol quartiles are as follows: HDL-C (low [ $\leq$ 41.83 mg/dL]; medium [ $>$ 41.83–51.38 mg/dL]; high [ $>$ 51.38–62.93 mg/dL]; and very high [ $>$ 62.93 mg/dL]), and non-HDL-C (low [ $\leq$ 114.42 mg/dL]; medium [ $>$ 114.42–140.1 mg/dL]; high [ $>$ 140.1–168.28 mg/dL]; and very high [ $>$ 168.28 mg/dL]).

<sup>2</sup> Fasting refers to a duration of  $\geq$ 9 hours.

<sup>3</sup> Unadjusted model.

<sup>4</sup> Adjusted for age, race/ethnicity, gender, smoking and BMI.
